# Supplementary material for: Exotic fishes that are phylogenetically close but functionally distant to native fishes are more likely to establish
Source: PubMed Central journal article supplement (PMC9543100; doi:10.1111/gcb.16360), 2022-08-04
Supplement: GCB-28-5683-s001.pdf [file GCB-28-5683-s001.pdf]

## Exotic fishes phylogenetically close but functionally distant to native ones are more likely to establish

### Supplementary information (section 2) for the nearest indexes

Meng Xu *et al.*

**Table S1.** Parameter estimates for the best Bayesian hierarchical model to explain fish establishment success using multiple standardized explanatory variables (subtracting the mean and dividing by the standard deviation). Bold values are significantly different from zero (based on 95% credible intervals).

| Predictors               | Mean        | SD          | 0.025<br>quant | 0.15<br>quant | 0.5<br>quant | 0.85<br>quant | 0.975<br>quant |
|--------------------------|-------------|-------------|----------------|---------------|--------------|---------------|----------------|
| Introduction-native MNTD | -0.12       | 0.11        | -0.35          | -0.24         | -0.12        | -0.01         | 0.10           |
| Introduction-native MNFD | -0.24       | 0.15        | -0.54          | -0.40         | -0.24        | -0.08         | 0.06           |
| Species richness         | 0.03        | 0.14        | -0.25          | -0.12         | 0.03         | 0.18          | 0.31           |
| Native MNTD              | -0.10       | 0.13        | -0.35          | -0.23         | -0.10        | 0.03          | 0.15           |
| Native MNFD              | 0.14        | 0.12        | -0.08          | 0.02          | 0.14         | 0.26          | 0.38           |
| Area                     | -0.29       | 0.18        | -0.68          | -0.47         | -0.27        | -0.11         | 0.01           |
| Elevation                | 0.09        | 0.11        | -0.13          | -0.03         | 0.09         | 0.20          | 0.31           |
| <b>Latitude</b>          | <b>0.27</b> | <b>0.11</b> | <b>0.06</b>    | <b>0.16</b>   | <b>0.27</b>  | <b>0.39</b>   | <b>0.49</b>    |

**Table S2.** Parameter estimates for averaging generalized linear mixed model to explain fish establishment success using standardized explanatory variables (subtracting the mean and dividing by the standard deviation). Bold values denote the significant effects ( $P < 0.05$ ). The model average is conducted by selecting and averaging the best fitted mixed models ( $\Delta AIC < 2$ ).

|                          | Estimate    | SE          | Adjusted SE | z value     | Pr ( $> z $ ) |
|--------------------------|-------------|-------------|-------------|-------------|---------------|
| Introduction-native MNTD | -0.03       | 0.08        | 0.08        | 0.42        | 0.67          |
| Introduction-native MNFD | -0.14       | 0.16        | 0.16        | 0.86        | 0.39          |
| Species richness         | 0.00        | 0.03        | 0.03        | 0.05        | 0.96          |
| Native MNTD              | -0.01       | 0.04        | 0.04        | 0.20        | 0.84          |
| Native MNFD              | 0.00        | 0.03        | 0.03        | 0.09        | 0.93          |
| Area                     | -0.29       | 0.17        | 0.17        | 1.73        | 0.08          |
| Elevation                | 0.01        | 0.04        | 0.04        | 0.17        | 0.86          |
| <b>Latitude</b>          | <b>0.28</b> | <b>0.09</b> | <b>0.09</b> | <b>2.99</b> | <b>0.00</b>   |

**Table S3.** Candidate structural equation modelings (SEMs)

| Model       | Explanation                                                                                                            | <i>Fisher's C</i> | <i>P</i>    | K         | AIC           | $\Delta$ AIC | AIC weight  |
|-------------|------------------------------------------------------------------------------------------------------------------------|-------------------|-------------|-----------|---------------|--------------|-------------|
| SEM1        | Initial model                                                                                                          | 87.49             | 0.00        | 45        | 177.49        | 77.45        | 0.00        |
| SEM2        | Initial model plus effects of elevation on both similarity                                                             | 12.81             | 0.12        | 47        | 106.81        | 6.77         | 0.01        |
| <b>SEM3</b> | <b>Initial model plus effects of elevation and latitude on both similarity</b>                                         | <b>2.04</b>       | <b>0.73</b> | <b>49</b> | <b>100.04</b> | <b>0.00</b>  | <b>0.44</b> |
| SEM4        | Initial model plus effects of elevation and latitude on both similarity, and effect of area on phylogenetic similarity | 1.22              | 0.54        | 50        | 101.22        | 1.18         | 0.24        |
| SEM5        | Initial model plus effects of elevation and latitude on both similarity, and effect of area on functional similarity   | 0.82              | 0.66        | 50        | 100.82        | 0.78         | 0.30        |

**Table S4.** Parameter estimates and standardized coefficients for the best-supported model

| Response                    | Predictor                | Estimate      | SE           | DF             | <i>P</i> Value | Std. Coef     |
|-----------------------------|--------------------------|---------------|--------------|----------------|----------------|---------------|
| Introduction outcome        | Introduction-native MNTD | -0.546        | 0.538        | 965.000        | 0.310          | -0.048        |
| Introduction outcome        | Introduction-native MNFD | -0.287        | 0.236        | 965.000        | 0.224          | -0.076        |
| Introduction outcome        | Species richness         | 0.006         | 0.043        | 965.000        | 0.885          | 0.009         |
| Introduction outcome        | Native MNTD              | -0.458        | 0.645        | 965.000        | 0.478          | -0.038        |
| Introduction outcome        | Native MNFD              | 0.182         | 0.170        | 965.000        | 0.284          | 0.051         |
| <b>Introduction outcome</b> | <b>Area</b>              | <b>0.000</b>  | <b>0.000</b> | <b>965.000</b> | <b>0.046</b>   | <b>-0.126</b> |
| Introduction outcome        | Elevation                | 0.001         | 0.001        | 965.000        | 0.501          | 0.031         |
| <b>Introduction outcome</b> | <b>Latitude</b>          | <b>0.077</b>  | <b>0.033</b> | <b>965.000</b> | <b>0.019</b>   | <b>0.105</b>  |
| Introduction-native MNTD    | Native MNTD              | 0.001         | 0.039        | 850.058        | 0.980          | 0.001         |
| <b>Introduction-native</b>  | <b>Species richness</b>  | <b>-0.011</b> | <b>0.002</b> | <b>686.457</b> | <b>0.000</b>   | <b>-0.177</b> |
| <b>Introduction-native</b>  | <b>Native MNFD</b>       | <b>0.077</b>  | <b>0.009</b> | <b>847.717</b> | <b>0.000</b>   | <b>0.246</b>  |
| <b>Introduction-native</b>  | <b>Elevation</b>         | <b>0.000</b>  | <b>0.000</b> | <b>725.412</b> | <b>0.000</b>   | <b>-0.159</b> |
| Introduction-native MNTD    | Latitude                 | -0.001        | 0.002        | 592.515        | 0.613          | -0.017        |
| <b>Introduction-native</b>  | <b>Native MNFD</b>       | <b>0.102</b>  | <b>0.021</b> | <b>839.250</b> | <b>0.000</b>   | <b>0.108</b>  |
| <b>Introduction-native</b>  | <b>Species richness</b>  | <b>-0.026</b> | <b>0.005</b> | <b>626.991</b> | <b>0.000</b>   | <b>-0.136</b> |
| Introduction-native MNFD    | Native MNTD              | 0.055         | 0.086        | 821.442        | 0.521          | 0.017         |
| <b>Introduction-native</b>  | <b>Elevation</b>         | <b>0.000</b>  | <b>0.000</b> | <b>718.785</b> | <b>0.020</b>   | <b>-0.056</b> |
| <b>Introduction-native</b>  | <b>Latitude</b>          | <b>-0.012</b> | <b>0.005</b> | <b>542.116</b> | <b>0.010</b>   | <b>-0.062</b> |
| <b>Native MNTD</b>          | <b>Elevation</b>         | <b>0.000</b>  | <b>0.000</b> | <b>703.053</b> | <b>0.000</b>   | <b>0.170</b>  |
| Native MNTD                 | Latitude                 | 0.005         | 0.003        | 713.974        | 0.104          | 0.078         |
| <b>Native MNTD</b>          | <b>Area</b>              | <b>0.000</b>  | <b>0.000</b> | <b>662.359</b> | <b>0.000</b>   | <b>-0.131</b> |
| Native MNFD                 | Elevation                | 0.000         | 0.000        | 702.870        | 0.259          | 0.054         |
| Native MNFD                 | Latitude                 | -0.008        | 0.010        | 716.298        | 0.461          | -0.037        |
| <b>Native MNFD</b>          | <b>Area</b>              | <b>0.000</b>  | <b>0.000</b> | <b>663.375</b> | <b>0.009</b>   | <b>-0.099</b> |
| <b>Species richness</b>     | <b>Elevation</b>         | <b>-0.002</b> | <b>0.000</b> | <b>965.000</b> | <b>0.000</b>   | <b>-0.387</b> |
| <b>Species richness</b>     | <b>Latitude</b>          | <b>-0.031</b> | <b>0.007</b> | <b>965.000</b> | <b>0.000</b>   | <b>-0.177</b> |
| <b>Species richness</b>     | <b>Area</b>              | <b>0.000</b>  | <b>0.000</b> | <b>965.000</b> | <b>0.000</b>   | <b>0.129</b>  |
| ~~Introduction-native       | ~~Introduction-native    | <b>0.278</b>  | NA           | <b>965.000</b> | <b>0.000</b>   | <b>0.278</b>  |
| ~~Native MNTD               | ~~Species richness       | <b>-0.534</b> | NA           | <b>965.000</b> | <b>0.000</b>   | <b>-0.534</b> |
| ~~native MNFD               | ~~Species richness       | <b>-0.392</b> | NA           | <b>965.000</b> | <b>0.000</b>   | <b>-0.392</b> |
| ~~Native MNTD               | ~~native MNFD            | <b>0.575</b>  | NA           | <b>965.000</b> | <b>0.000</b>   | <b>0.575</b>  |

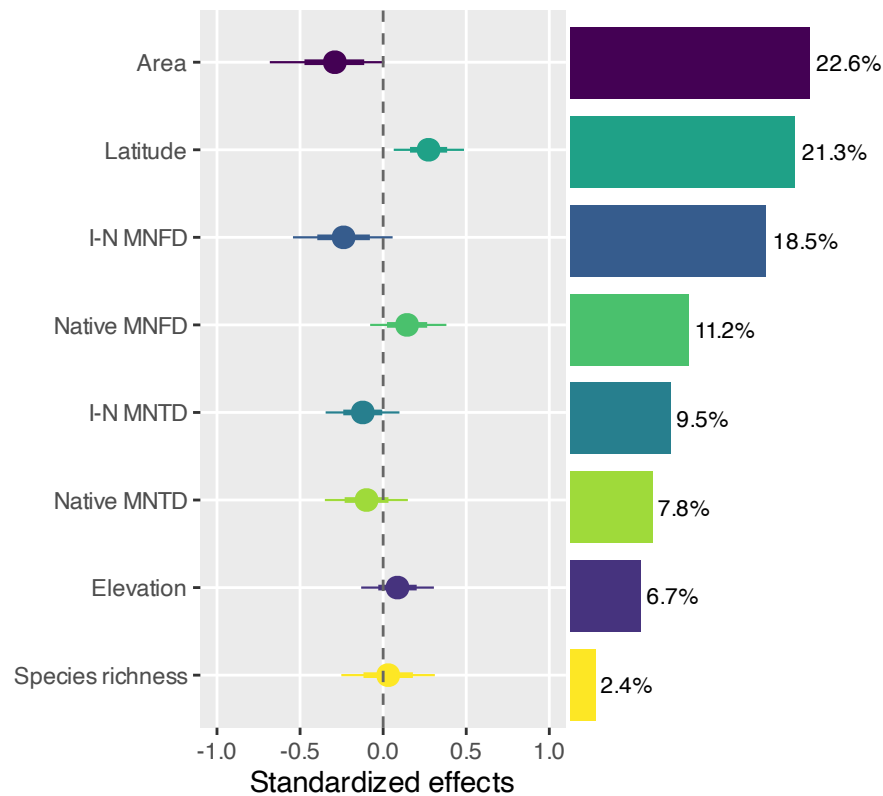

**Figure S1.** The effects and relative importance of predictive variables in explaining the establishment success of exotic fishes. The standardized effect size ( $\pm$  95% and 70% credible intervals) was derived from Bayesian hierarchical model with predictive variables being standardized (by subtracting the mean and dividing by the standard deviation). The relative importance of each predictor, expressed as the percentage of explained variance, was calculated using the ratio between its standardized parameter estimate and the sum of all standardized parameter estimates. Dashed lines indicate effect = 0. Positive effects (the 95% credible interval does not include zero) indicate that the establishment probability increases with increasing values of predictive variables, while the negative effects indicate the opposite. MNTD denotes the mean nearest phylogenetic distance of native species, while MNFD denotes the mean nearest functional distance. I-N MNTD denotes the mean nearest phylogenetic distance between introduced exotic species and native species, while the I-N MNFD denotes the mean nearest functional distance between introduced exotic species and native species.

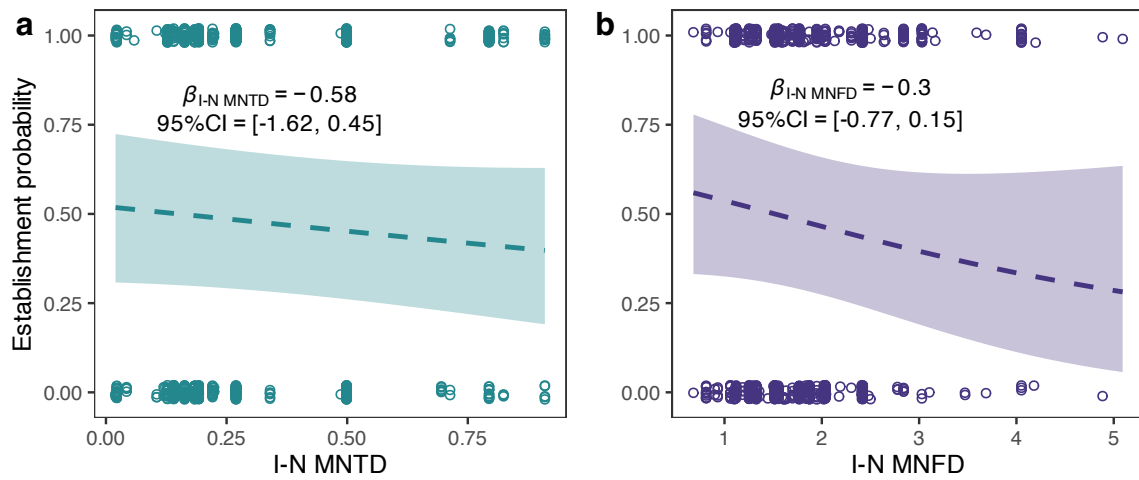

**Figure S2.** The respective relationships between the probability of successful establishment and introduced-native nearest phylogenetic distance (a), introduced-native nearest functional distance (b). The predictive curves (with 95% credible bands) were derived from the Bayesian hierarchical models with fixing the other predictive variables at the mean values. To make the relationships straightforward, the models were fitted with the raw values of predictive variables.

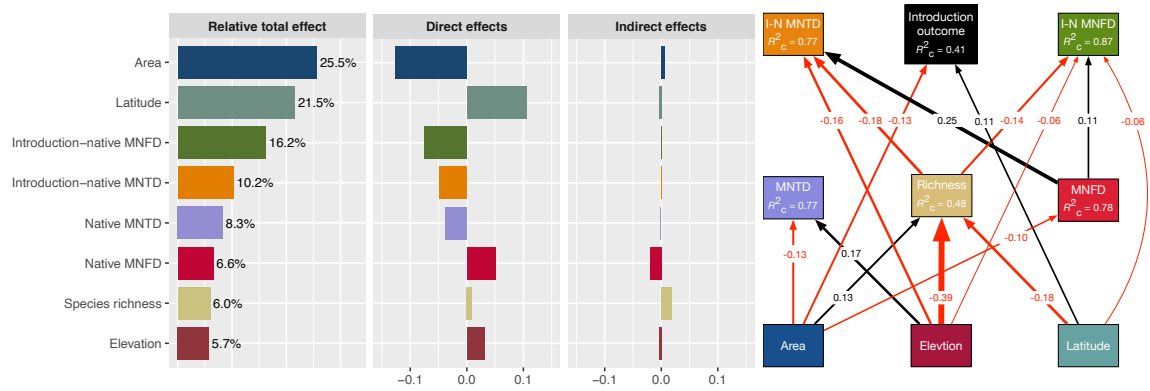

**Figure S3.** Structural equation modeling (SEM) exploring the effects of similarity, diversity, and geographical factors on the establishment of exotic fish species. MNTD denotes the mean nearest phylogenetic distance of native species, while MNFD denotes the mean nearest functional distance (*i.e.* phylogenetic and functional diversity respectively). I-N MNTD denotes the mean nearest phylogenetic distance between introduced exotic species and native species, while the I-N MNFD denotes the mean nearest functional distance between introduced exotic species and native species (*i.e.* exotic-native phylogenetic and functional similarity respectively). This SEM is determined through model comparison and fits the data well (Fisher's  $C = 2.042$ , d.f. = 4,  $P = 0.728$ ;  $K = 49$ ,  $n = 965$ ) and, for clarity, only the significant paths ( $P < 0.05$ ) are shown in the figure. Boxes represent measured variables and arrows represent relationships among variables. Black arrows denote positive relationships and red arrows negative ones. Standardized path coefficients are given for each significant path, the width of which is scaled by the magnitude of the standardized path coefficient. Conditional  $R_c^2$  (based on both fixed and random effects) for each endogenous variable are reported in the corresponding boxes. The relative total effects, direct effects, and indirect effects on the establishment of exotic species are calculated and shown in the left part of this figure.
