# Supplementary material for: Exotic fishes that are phylogenetically close but functionally distant to native fishes are more likely to establish
Source: PubMed Central journal article supplement (PMC9543100; doi:10.1111/gcb.16360), 2022-08-04
Supplement: GCB-28-5683-s002.pdf [file GCB-28-5683-s002.pdf]

**Exotic fishes phylogenetically close but functionally distant to native ones are more likely to establish**

**Supplementary information**

*Meng Xu et al.*

**Table S1.** Parameter estimates for the Bayesian hierarchical model to explain fish establishment success using multiple standardized explanatory variables (subtracting the mean and dividing by the standard deviation). Bold values are significantly different from zero (based on 95% credible intervals).

| Predictors                     | Mean         | SD          | 0.025<br>quant | 0.15<br>quant | 0.5<br>quant | 0.85<br>quant | 0.975<br>quant |
|--------------------------------|--------------|-------------|----------------|---------------|--------------|---------------|----------------|
| <b>Introduction-native MPD</b> | <b>-0.41</b> | <b>0.11</b> | <b>-0.64</b>   | <b>-0.53</b>  | <b>-0.41</b> | <b>-0.29</b>  | <b>-0.19</b>   |
| <b>Introduction-native MFD</b> | <b>0.33</b>  | <b>0.17</b> | <b>0.00</b>    | <b>0.16</b>   | <b>0.33</b>  | <b>0.51</b>   | <b>0.67</b>    |
| Species richness               | 0.10         | 0.12        | -0.13          | -0.02         | 0.10         | 0.22          | 0.33           |
| Native MPD                     | -0.03        | 0.11        | -0.25          | -0.14         | -0.03        | 0.08          | 0.18           |
| Native MFD                     | -0.08        | 0.14        | -0.36          | -0.23         | -0.08        | 0.07          | 0.20           |
| Area                           | -0.30        | 0.18        | -0.70          | -0.49         | -0.28        | -0.11         | 0.01           |
| Elevation                      | 0.01         | 0.11        | -0.21          | -0.10         | 0.01         | 0.13          | 0.24           |
| Latitude                       | 0.19         | 0.11        | -0.02          | 0.08          | 0.19         | 0.31          | 0.41           |

**Table S2.** Parameter estimates for averaging generalized linear mixed model to explain fish establishment success using standardized explanatory variables (subtracting the mean and dividing by the standard deviation). Bold values denote the significant effects ( $P < 0.05$ ). The model average is conducted by selecting and averaging the best fitted mixed models ( $\Delta AIC < 2$ ).

|                                | Estimate     | SE          | Adjusted SE | z value     | Pr ( $> z $ ) |
|--------------------------------|--------------|-------------|-------------|-------------|---------------|
| <b>Introduction-native MPD</b> | <b>-0.43</b> | <b>0.11</b> | <b>0.11</b> | <b>3.86</b> | <b>0.00</b>   |
| <b>Introduction-native MFD</b> | <b>0.32</b>  | <b>0.15</b> | <b>0.15</b> | <b>2.07</b> | <b>0.04</b>   |
| Species richness               | 0.01         | 0.05        | 0.05        | 0.26        | 0.79          |
| Native MPD                     | -0.01        | 0.04        | 0.04        | 0.22        | 0.83          |
| Native MFD                     | -0.05        | 0.10        | 0.10        | 0.48        | 0.63          |
| Area                           | -0.24        | 0.18        | 0.18        | 1.36        | 0.17          |
| Latitude                       | 0.12         | 0.12        | 0.12        | 1.03        | 0.30          |

**Table S3.** The comparison of Candidate structural equation modelings (SEMs)

| Model       | Explanation                                                                                                            | <i>Fisher's C</i> | <i>P</i>    | K         | AIC          | $\Delta$ AIC | AIC weight  |
|-------------|------------------------------------------------------------------------------------------------------------------------|-------------------|-------------|-----------|--------------|--------------|-------------|
| SEM1        | Initial model                                                                                                          | 119.38            | 0.00        | 45        | 209.38       | 110.77       | 0.00        |
| SEM2        | Initial model plus effects of elevation on both similarity                                                             | 27.04             | 0.00        | 47        | 121.04       | 22.43        | 0.00        |
| <b>SEM3</b> | <b>Initial model plus effects of elevation and latitude on both similarity</b>                                         | <b>0.61</b>       | <b>0.96</b> | <b>49</b> | <b>98.61</b> | <b>0.00</b>  | <b>0.54</b> |
| SEM4        | Initial model plus effects of elevation and latitude on both similarity, and effect of area on phylogenetic similarity | 0.13              | 0.94        | 50        | 100.13       | 1.52         | 0.25        |
| SEM5        | Initial model plus effects of elevation and latitude on both similarity, and effect of area on functional similarity   | 0.48              | 0.79        | 50        | 100.48       | 1.87         | 0.21        |

**Table S4.** Parameter estimates and standardized coefficients for the best-supported SEM

| Response                       | Predictor                      | Estimate      | SE           | DF             | <i>P</i> Value | Std. Coef     |
|--------------------------------|--------------------------------|---------------|--------------|----------------|----------------|---------------|
| <b>Introduction outcome</b>    | <b>Introduction-native MPD</b> | <b>-3.270</b> | <b>0.955</b> | <b>965.000</b> | <b>0.001</b>   | <b>-0.172</b> |
| <b>Introduction outcome</b>    | <b>Introduction-native MFD</b> | <b>0.543</b>  | <b>0.237</b> | <b>965.000</b> | <b>0.022</b>   | <b>0.165</b>  |
| Introduction outcome           | Species richness               | 0.026         | 0.035        | 965.000        | 0.458          | 0.038         |
| Introduction outcome           | Native MPD                     | -0.211        | 0.988        | 965.000        | 0.831          | -0.010        |
| Introduction outcome           | Native MFD                     | -0.139        | 0.164        | 965.000        | 0.396          | -0.051        |
| <b>Introduction outcome</b>    | <b>Area</b>                    | <b>0.000</b>  | <b>0.000</b> | <b>965.000</b> | <b>0.045</b>   | <b>-0.134</b> |
| Introduction outcome           | Elevation                      | 0.000         | 0.001        | 965.000        | 0.937          | 0.004         |
| Introduction outcome           | Latitude                       | 0.051         | 0.034        | 965.000        | 0.132          | 0.073         |
| <b>Introduction-native MPD</b> | <b>Native MPD</b>              | <b>0.371</b>  | <b>0.031</b> | <b>856.602</b> | <b>0.000</b>   | <b>0.332</b>  |
| <b>Introduction-native MPD</b> | <b>Species richness</b>        | <b>0.005</b>  | <b>0.001</b> | <b>700.967</b> | <b>0.000</b>   | <b>0.145</b>  |
| <b>Introduction-native MPD</b> | <b>Native MFD</b>              | <b>0.027</b>  | <b>0.004</b> | <b>778.814</b> | <b>0.000</b>   | <b>0.188</b>  |
| <b>Introduction-native MPD</b> | <b>Elevation</b>               | <b>0.000</b>  | <b>0.000</b> | <b>726.806</b> | <b>0.000</b>   | <b>-0.179</b> |
| <b>Introduction-native MPD</b> | <b>Latitude</b>                | <b>-0.006</b> | <b>0.001</b> | <b>573.448</b> | <b>0.000</b>   | <b>-0.154</b> |
| <b>Introduction-native MFD</b> | <b>Native MFD</b>              | <b>0.428</b>  | <b>0.016</b> | <b>763.396</b> | <b>0.000</b>   | <b>0.518</b>  |
| <b>Introduction-native MFD</b> | <b>Species richness</b>        | <b>0.011</b>  | <b>0.004</b> | <b>667.422</b> | <b>0.007</b>   | <b>0.054</b>  |
| Introduction-native MFD        | Native MPD                     | 0.093         | 0.122        | 846.275        | 0.449          | 0.014         |
| Introduction-native MFD        | Elevation                      | 0.000         | 0.000        | 722.272        | 0.282          | -0.024        |
| Introduction-native MFD        | Latitude                       | 0.003         | 0.005        | 535.617        | 0.495          | 0.015         |
| <b>Native MPD</b>              | <b>Elevation</b>               | <b>0.000</b>  | <b>0.000</b> | <b>706.876</b> | <b>0.023</b>   | <b>-0.105</b> |
| <b>Native MPD</b>              | <b>Latitude</b>                | <b>-0.005</b> | <b>0.002</b> | <b>715.127</b> | <b>0.001</b>   | <b>-0.160</b> |
| <b>Native MPD</b>              | <b>Area</b>                    | <b>0.000</b>  | <b>0.000</b> | <b>658.347</b> | <b>0.028</b>   | <b>-0.080</b> |
| <b>Native MFD</b>              | <b>Elevation</b>               | <b>-0.001</b> | <b>0.000</b> | <b>698.525</b> | <b>0.000</b>   | <b>-0.186</b> |
| <b>Native MFD</b>              | <b>Latitude</b>                | <b>-0.080</b> | <b>0.012</b> | <b>709.917</b> | <b>0.000</b>   | <b>-0.312</b> |
| Native MFD                     | Area                           | 0.000         | 0.000        | 665.043        | 0.192          | -0.046        |
| <b>Species richness</b>        | <b>Elevation</b>               | <b>-0.002</b> | <b>0.000</b> | <b>965.000</b> | <b>0.000</b>   | <b>-0.387</b> |
| <b>Species richness</b>        | <b>Latitude</b>                | <b>-0.031</b> | <b>0.006</b> | <b>965.000</b> | <b>0.000</b>   | <b>-0.177</b> |
| <b>Species richness</b>        | <b>Area</b>                    | <b>0.000</b>  | <b>0.000</b> | <b>965.000</b> | <b>0.000</b>   | <b>0.129</b>  |
| ~~Introduction-native MPD      | ~~ Introduction-native MFD     | 0.285         | NA           | 965.000        | 0.000          | 0.285         |
| ~~Native MPD                   | ~~Species richness             | -0.191        | NA           | 965.000        | 0.000          | -0.191        |
| ~~native MFD                   | ~~Species richness             | -0.053        | NA           | 965.000        | 0.050          | -0.053        |
| ~~Native MPD                   | ~~native MFD                   | 0.446         | NA           | 965.000        | 0.000          | 0.446         |

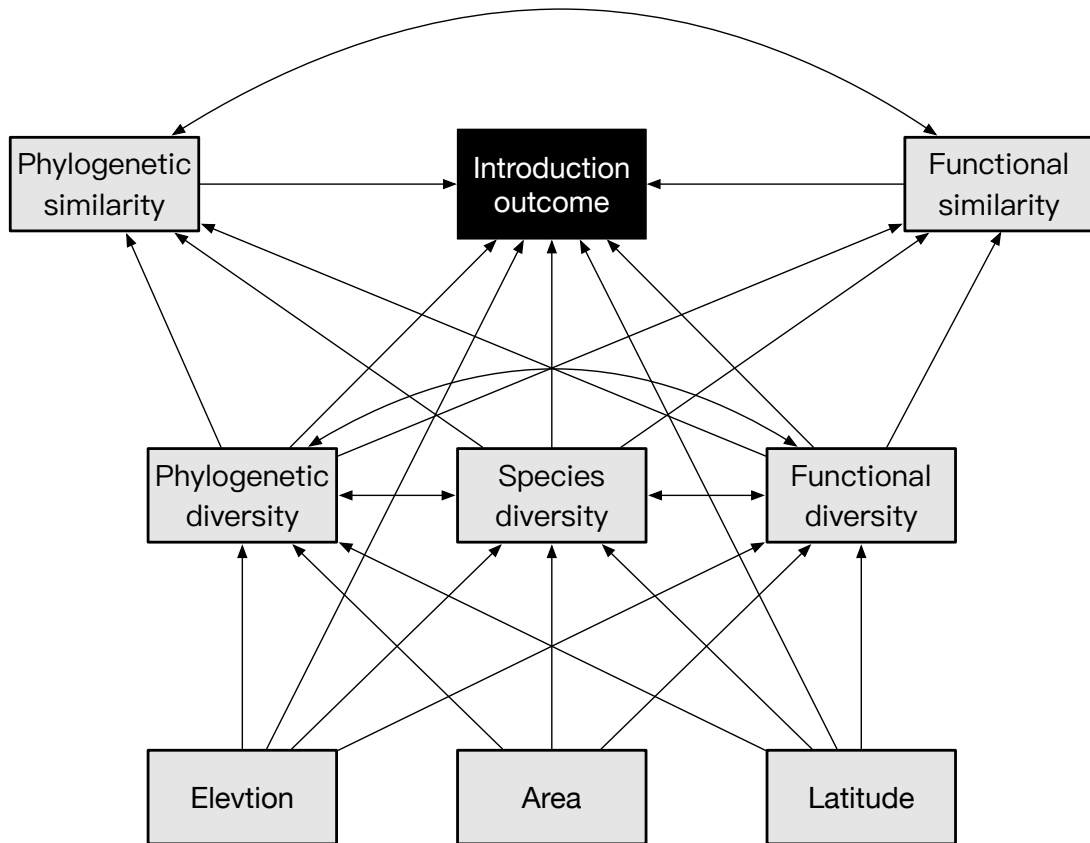

**Figure S1.** The initial model for structural equation modeling (SEM) exploring the effects of similarity, diversity, and geographical factors on the establishment of exotic fish species.

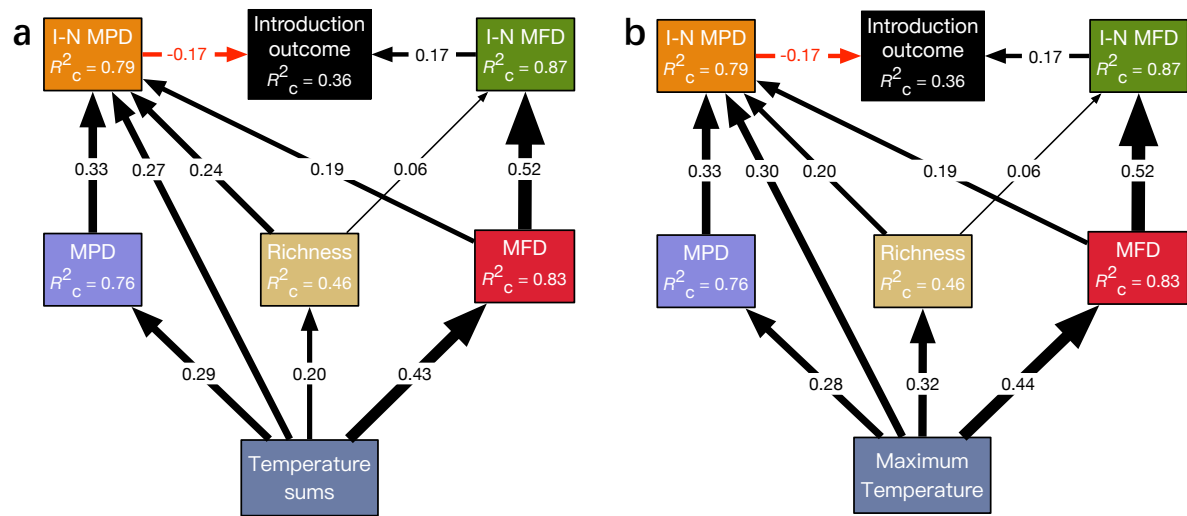

**Figure S2.** Structural equation modeling (SEM) exploring the effects of similarity, diversity on the establishment of exotic fish species considering the accumulated water temperature (a) and maximum water temperature (b). Both SEMs fit the data well (a: Fisher's  $C = 0.083$ , d.f. = 2,  $P = 0.959$ ;  $K = 38$ ,  $n = 965$ ; b: Fisher's  $C = 0.408$ , d.f. = 2,  $P = 0.816$ ;  $K = 38$ ,  $n = 965$ ). For clarity, only the significant paths ( $P < 0.05$ ) are shown in the figures. Boxes represent measured variables and arrows represent relationships among variables. Black arrows denote positive relationships and red arrows negative ones. Standardized path coefficients are given for each significant path, the width of which is scaled by the magnitude of the standardized path coefficient. Conditional  $R_c^2$  (based on both fixed and random effects) for each endogenous variable are reported in the corresponding boxes.
